# Supplementary material for: Rhodoalgimonas zhirmunskyi gen. nov., sp. nov., a Marine Alphaproteobacterium Isolated from the Pacific Red Alga Ahnfeltia tobuchiensis: Phenotypic Characterization and Pan-Genome Analysis
Source: MDPI journal article supplement (doi:10.3390/microorganisms11102463), 2023-09-30
Supplement: s1 [file s1]

# ***Rhodoaligimonas zhirmunskyi* gen. nov., sp. nov., a marine alphaproteobacterium isolated from the Pacific red alga *Ahnfeltia tobuchiensis*: phenotypic characterization and pan-genome analysis**

Olga Nedashkovskaya <sup>1\*</sup>, Nadezhda Otstavnykh <sup>1</sup>, Larissa Balabanova <sup>1</sup>, Evgenia Bystritskaya <sup>1</sup>, Song-Gun Kim <sup>2</sup>, Natalia Zhukova <sup>3</sup>, Liudmila Tekutyeva <sup>4,5</sup>, and Marina Isaeva <sup>1,\*</sup>

- <sup>1</sup> G.B. Elyakov Pacific Institute of Bioorganic Chemistry, Far Eastern Branch, Russian Academy of Sciences, Prospect 100 Let Vladivostoku, 159, Vladivostok 690022, Russia; olgannedashkovska@piboc.dvo.ru (O.N.); lbalabanova1@gmail.com (L.B.); chernysheva.nadezhda@gmail.com (N.O.); belyana@gmail.com; (V.K.); issaeva@piboc.dvo.ru (M.I.)
- <sup>2</sup> Korean Collection for Type Cultures, Biological Resource Center, Korea Research Institute of Bioscience and Biotechnology, 181 Ipsin-gil, Jeongeup-si, Jeollabuk-do 56212, Republic of Korea; sgkim@kribb.re.kr (S.K.)
- <sup>3</sup> A.V. Zhirmunsky National Scientific Center of Marine Biology, Far Eastern Branch, Russian Academy of Sciences, Palchevskogo Street 17, Vladivostok 690041, Russia; nzhukova35@list.ru (N.Z.)
- <sup>4</sup> Innovative Technology Center, Far Eastern Federal University, 8 Suhanova St., Vladivostok 690950, Russia; tekuteva.la@dvfu.ru (L.T.)
- <sup>5</sup> ARNIKA, Territory of PDA Nadezhdinskaya, Centralnaya St. 42, Volno-Nadezhdinskoye, Primorsky Krai, 692481 Vladivostok, Russia; tekuteva.la@dvfu.ru (L.T.)
- \*Correspondence: olgannedashkovska@piboc.dvo.ru (O.N.); issaeva@gmail.com (M.I.); Tel.: +7-423-231-1168 (O.N.)

## **Supplementary**

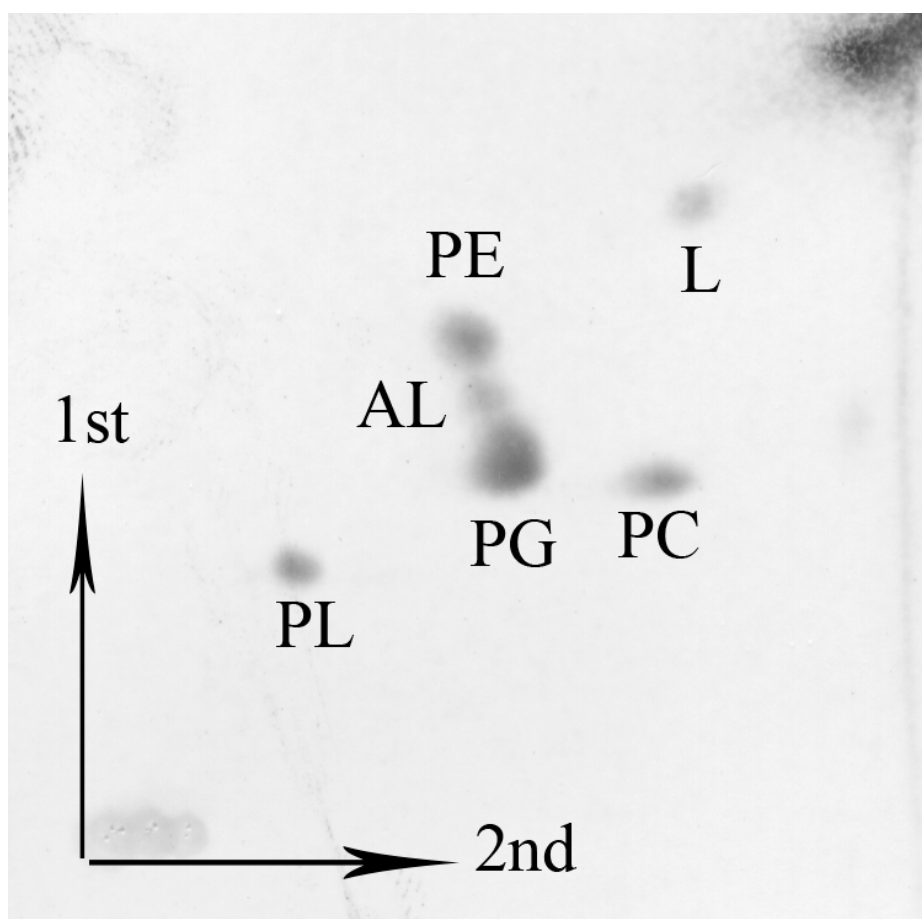

**Supplementary Figure S1.** Two-dimensional TLC of the total polar lipids of strain 10Alg 79<sup>T</sup>. First dimension, chloroform/methanol/water (65: 25: 4, v/v/v); second dimension, chloroform/methanol/acetic acid/water (80: 12: 15: 4, v/v/v/v). PE – phosphatidylethanolamine, PG – phosphatidylglycerol, PC – phosphatidylcholine, AL – an unidentified aminolipid, PL, an unidentified phospholipid, and L, an unidentified lipid.
